# Supplementary material
Source: PubMed Central journal article supplement (PMC2871291)
Supplement: NIHMS27659-supplement-1.pdf [file NIHMS27659-supplement-1.pdf]

Type of file: table

Label: Supp Info

Filename: Supplemental materal.pdf

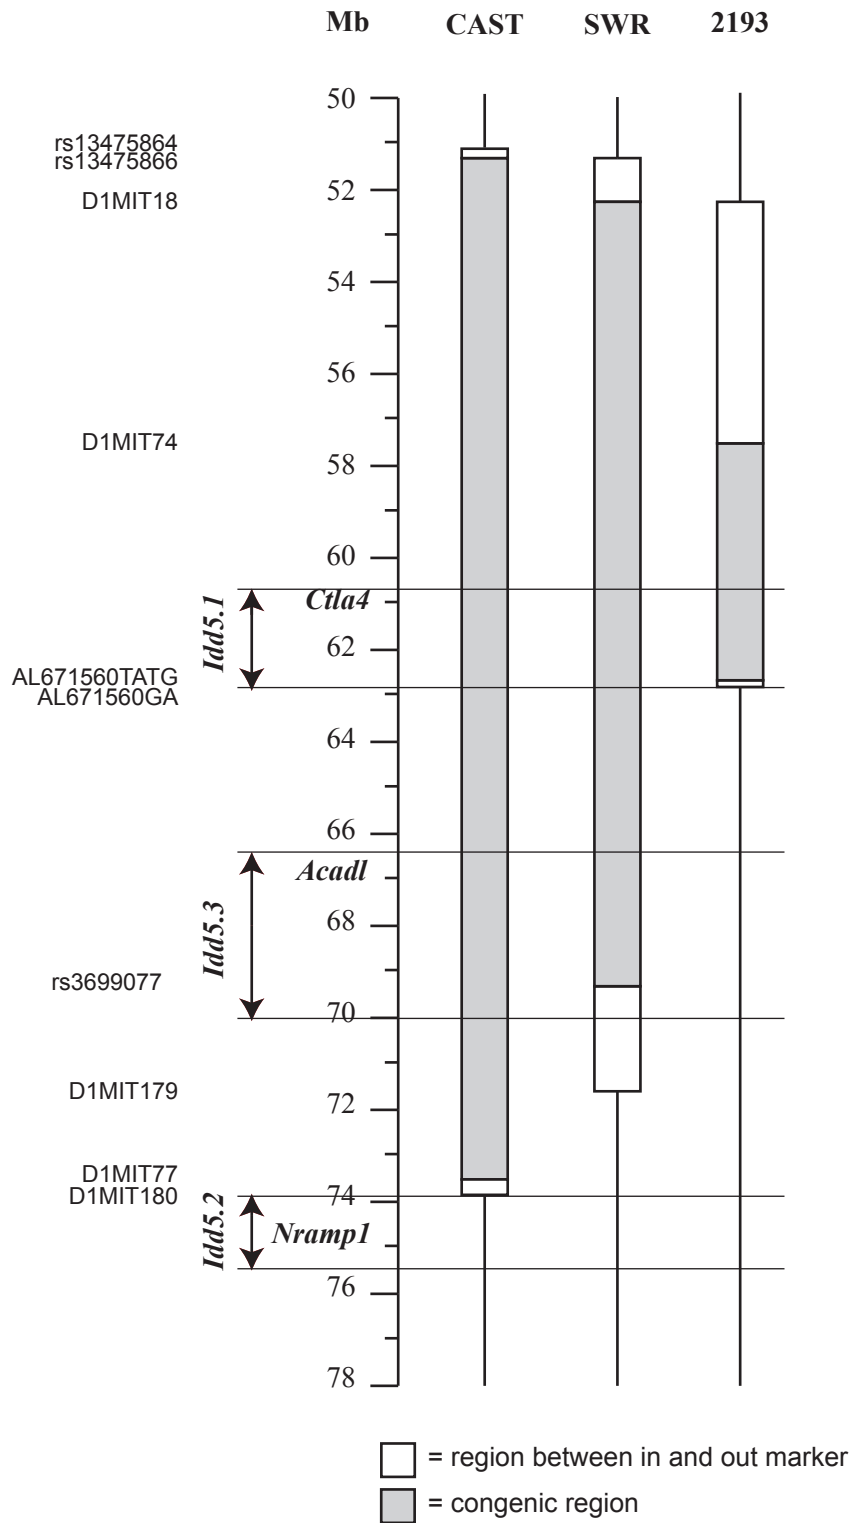

**Supplementary Figure 1: Genetic map of the NOD *Idd5.1* congenic strains used in this study.** The grey shaded areas represent CAST, SWR or B10-derived DNA introgressed onto the NOD background. Open boxes represent the region between the in and out markers. Mouse Ensembl build 54 was used to map the markers used in this study.

a.

```
SWR      GCTGTTGACACGGGACTGTA
NOD      GCTGTTGACACGGGACTGTA
B6       GCTGTTGACACGGGACTGTA
CAST     GCTGTTGACACGGGACTGTA
Human    GCCATGGACACGGGACTCTA
**      ***** **
```

b.

```
SWR      CAACGGGACGCAGATTTA
NOD      CAACGGGACGCAGATTTA
B6       CAACGGGACGCAGATTTA
CAST     CAACGGGACGCAGATTTA
Human    CAACGGAACCCAGATTTA
*** ** ** *****
```

**Supplementary Figure 2: CAST-specific SNPs at (a) 263 and (b) 332 bp in exon 2 of *Ctla4* alter exon splicing enhancer motifs in regions that are conserved in exon 2 of human *CTLA4*.**

Exon 2 sequences from human *CTLA4*, as well as from SWR, NOD, B6 and CAST mouse *Ctla4* were aligned using Clustal ([www.ebi.ac.uk/clustalw](http://www.ebi.ac.uk/clustalw)). An asterisk indicates bases that are conserved in all five sequences. SNPs at (a) 263 and (b) 332 bp are shown in bold.

Exon splicing enhancer (ESE) motifs were predicted using ESEfinder (1,2), and the strength of the predictions are depicted. ESE motifs with a prediction score of 1 to 2 above threshold are noted in purple, those with a score greater than 2 but less than 3 are green, and those with a score greater than 3 are red.

1. Smith, P. J., Zhang, C., Wang, J. Chew, S. L., Zhang, M. Q. and Krainer, A. R. 2006. An increased specificity score matrix for the prediction of SF2/ASF-specific exonic splicing enhancers. *Hum. Mol. Genet.* 15: 2490-2508.

2. Cartegni L., Wang J., Zhu Z., Zhang M. Q. and Krainer A. R.; 2003. ESEfinder: a web resource to identify exonic splicing enhancers. *Nucleic Acid Research* 31: 3568-3571.

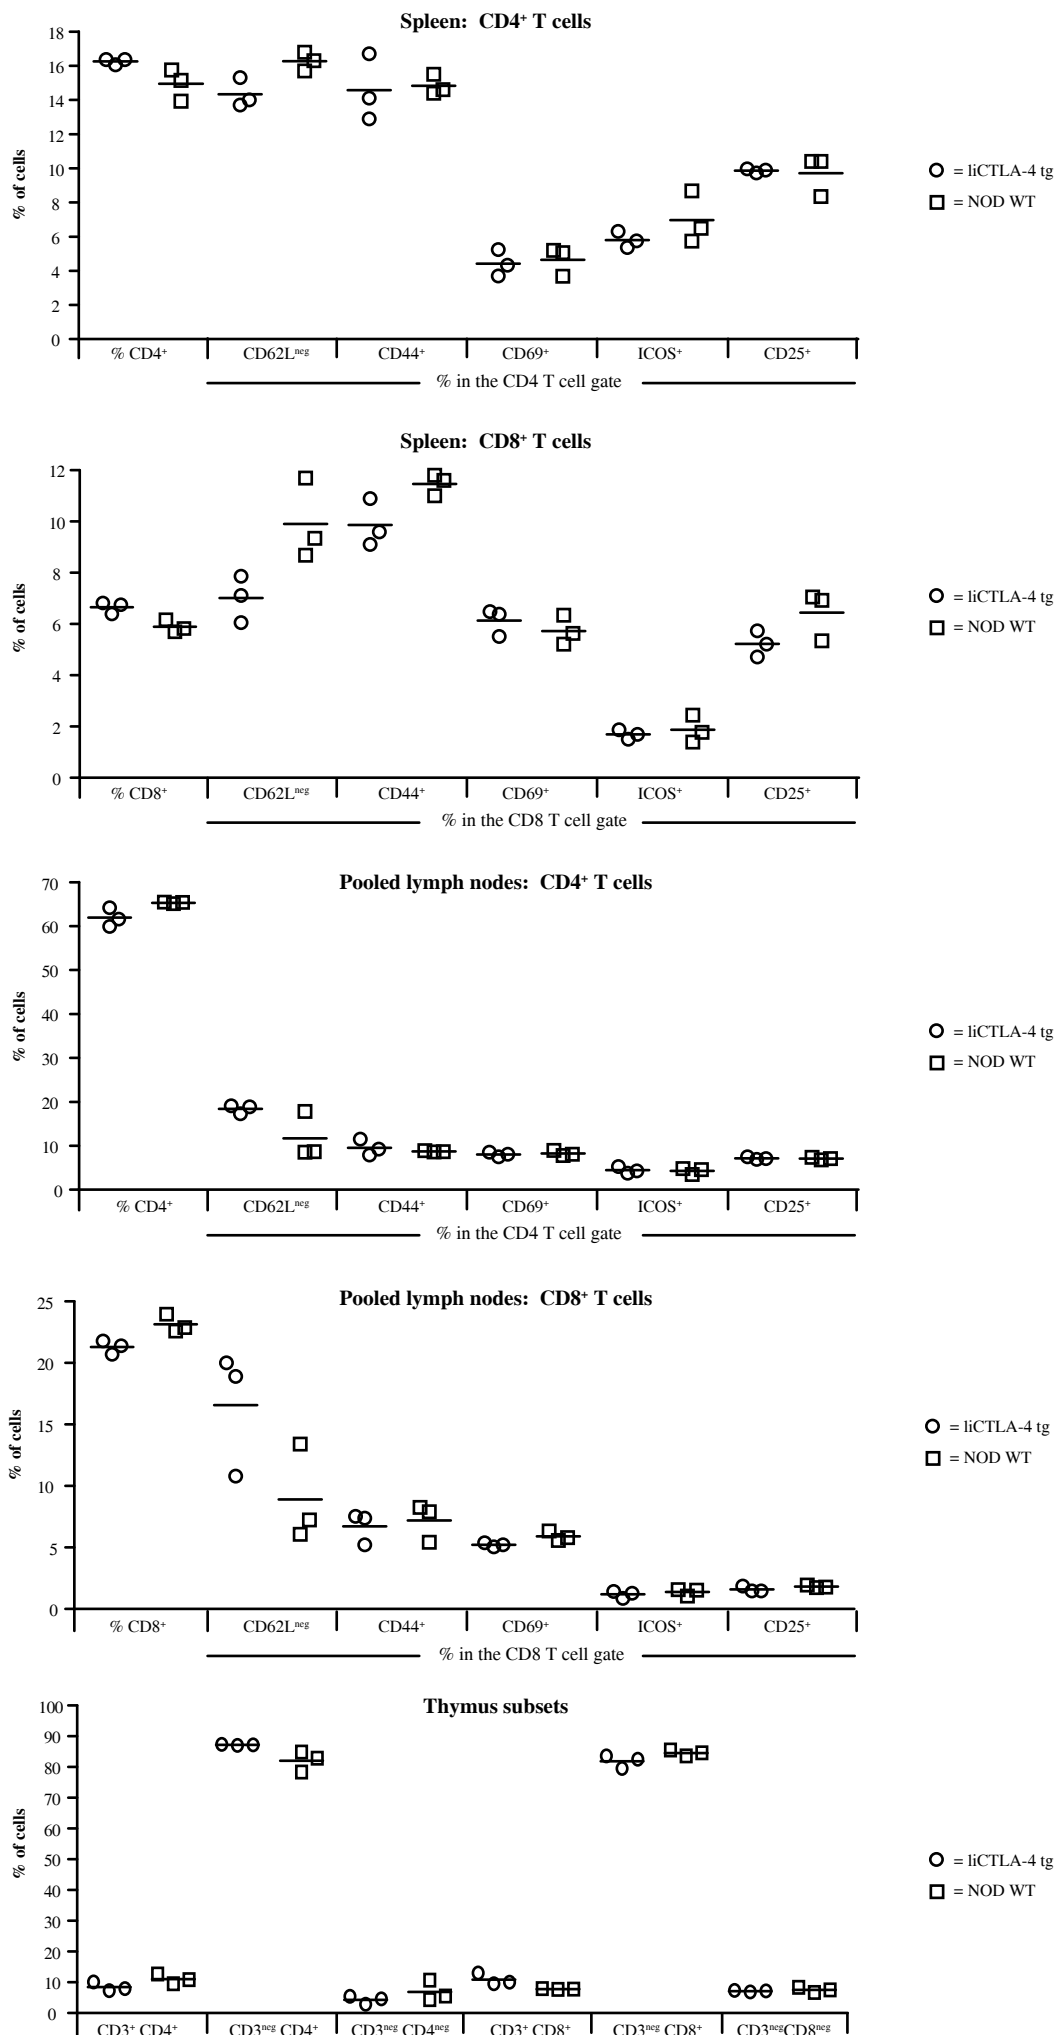

**Supplemental Figure 3:** NOD and liCTLA-4 tg NOD mice (females, 3 weeks of age) were compared for the percentages of CD4 and CD8 T cells in cells prepared from thymus, pooled lymph nodes and spleen. The percentages of the indicated activation markers were determined in spleen and lymph node cells for CD4 and CD8 T cells. None of the parameters were significant ( $P > 0.05$ ) as assessed using the Mann-Whitney test. This experiment is representative of 4 experiments performed in total (total of 10 mice evaluated from each strain).

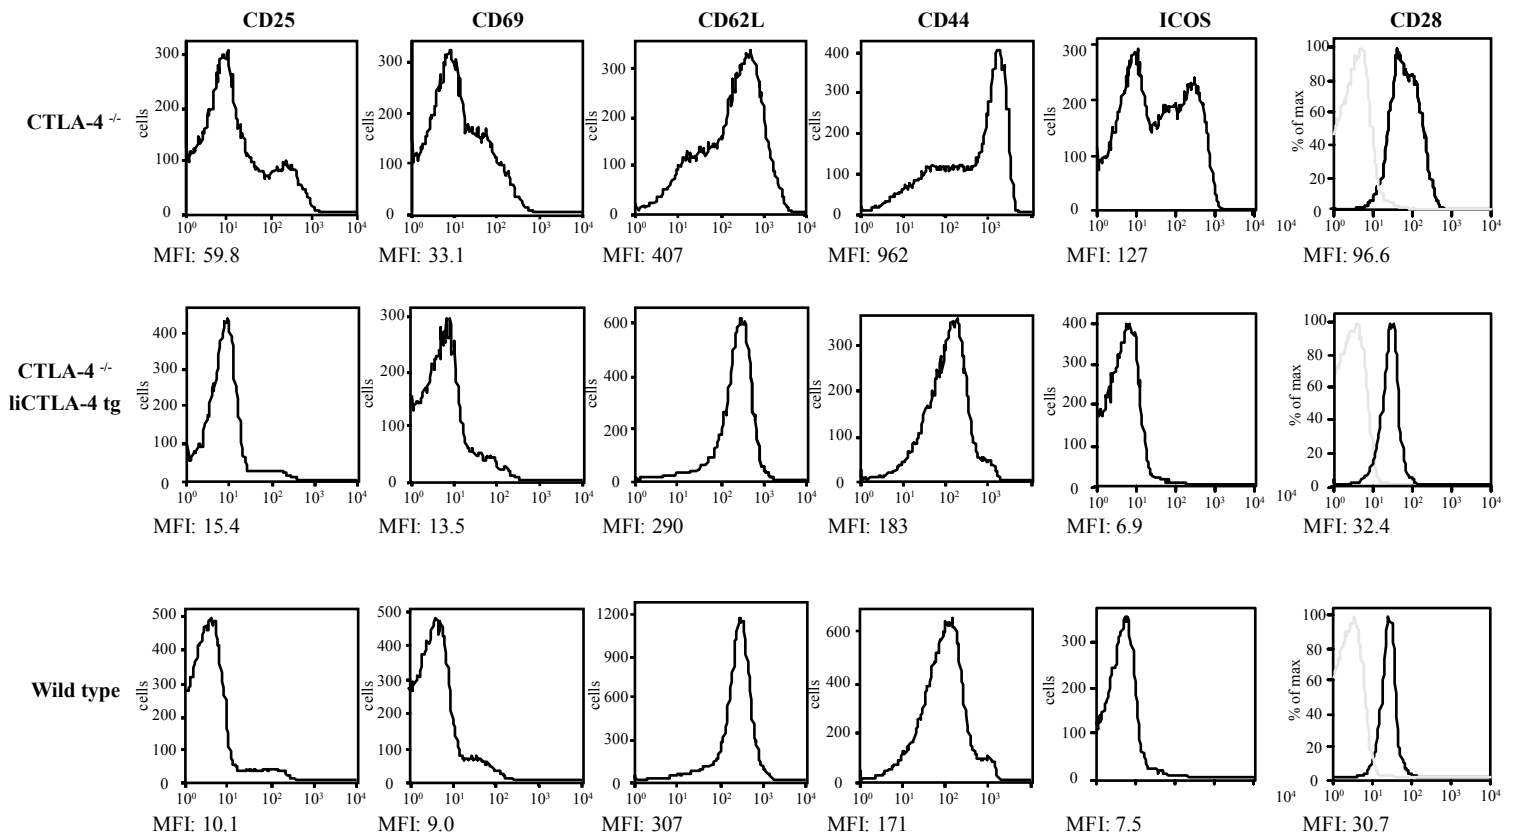

**Supplemental Figure 4:** Representative FACS profiles of the activation markers CD25, CD69, CD62L, CD44, ICOS and CD28 on CD4<sup>+</sup> T cells from CTLA-4<sup>-/-</sup>, CTLA-4<sup>-/-</sup> liCTLA-4 tg and wild type mice as described in Figure 5 are shown above. The MFI for each activation marker was calculated from T cells within the CD4<sup>+</sup> gate.

**Supplementary Table I:** Primer sequences used to detect NOD/B6 SNPs in multiple mouse strains.

| Marker Number | Marker Name                 | RFLP or +/- | Position (Mb) | Gene       | Forward primer           | Reverse Primer           |
|---------------|-----------------------------|-------------|---------------|------------|--------------------------|--------------------------|
| 1             | L1 repetitive element       | +           | 60.827        | Intragenic | ctgaaagttggagatgctttt    | ctgctgctgtgcttaggtc      |
|               |                             | -           | 60.827        | Intragenic | ctgaaagttggagatgctttt    | ataggaaggaacccgcaaga     |
| 2             | retroviral sequence element | +           | 60.834        | Intragenic | gcacatttaggcagcatcag     | taaggatctccaagcctcca     |
|               |                             | -           | 60.834        | Intragenic | gcacatttaggcagcatcag     | aggcaagcaagctcaaaaag     |
| 3             | Prox_Ctla4_SNP1             | Hae III     | 60.844        | Intragenic | ggaaagctgctaatacaatca    | ctccacagtctgaccaca       |
| 4             | Prox_Ctla4_SNP4             | Msp I       | 60.849        | Intragenic | caagtactatggggaagtactgta | tggagccatataccacctg      |
| 5             | CTLA4_Intron1_SNP           | Mae III     | 60.855        | Ctla4      | tggaccctgagcatctctct     | caggtgtctgctagccttc      |
| 6             | CTLA4_Exon2_SNP             | Mae III     | 60.857        | Ctla4      | gcctcaggtgtggcctaata     | ggactccaaccaaggaaca      |
| 7             | CTLA4_3utr_SNP1             | Aci I       | 60.86         | Intragenic | gccatgtaccagccgttate     | ctctacgtctgtaaaatgcca    |
| 8             | L1 repetitive element       | +           | 60.865        | Intragenic | gcctcaggtgggaaaaaca      | ggatatggggacttttgggt     |
|               |                             | -           | 60.865        | Intragenic | gcctcaggtgggaaaaaca      | aaaccaattgttgctttgc      |
| 9             | Distal_Ctla4_Snp1           | Bcl I       | 60.871        | Intragenic | acgataagcatgccaaaac      | aacctatgccacactcttc      |
| 10            | Proximal_Icos_SNP1          | Hinc II     | 60.888        | Intragenic | gtgcggctgaaagtctgttt     | ccttgatgactccaacgatca    |
| 11            | Proximal_Icos_SNP4          | BsaJI       | 60.903        | Intragenic | tcttgtagaggtgtctcaa      | catcgtaggggatgtctatgaa   |
| 12            | Icos_Exon1_SNP              | Nla III     | 60.922        | Icos       | caacctccacaaccactt       | gaactcaataagagctatggatgg |
| 13            | Icos_Intron1_SNP            | Mlu I       | 60.937        | Icos       | tcattgctgtggttcaggtt     | gagaaatgggctttcatctgtg   |
| 14            | Icos_Intron4_SNP            | Sca I       | 60.941        | Icos       | ggctgggaaggagatttag      | gctctgtttctttcctgtcc     |
| 15            | Distal_Icos_SNP1            | Taq I       | 60.946        | Intragenic | gccaaccatgaggactct       | tgggtttgccatctctacc      |
| 16            | Distal_Icos_SNP3            | Hae III     | 60.952        | Intragenic | gacatcaatagttacaacagtcca | ttgctagatcatagggtaaaagga |
| 17            | Distal_Icos_SNP4            | Hpy188 III  | 60.954        | Intragenic | tgtacggcatattgaacagca    | cccaatgaagtgaactgt       |
